# Supplementary material for: Capsular Polysaccharide Cross-Regulation Modulates Bacteroides thetaiotaomicron Biofilm Formation
Source: PubMed Central journal article supplement (PMC7315117; doi:10.1128/mbio.00729-20), 2020-06-23
Supplement: mBio.00729-20-st001.pdf [file mBio.00729-20-st001.pdf]

1 Supplementary Table S1. **Transposon insertion targets.**

| Name                               | Insertion                                    | Gene annotation on NCBI                                                                                    | Function                | Reference                               |
|------------------------------------|----------------------------------------------|------------------------------------------------------------------------------------------------------------|-------------------------|-----------------------------------------|
| Transposon mutant in WT            |                                              |                                                                                                            |                         |                                         |
| 1C1                                | <i>BT1356</i>                                | capsule polysaccharide export protein                                                                      | CPS4 synthesis          | Xu <i>et al.</i> , 2003                 |
| 2C7                                | <i>BT1342</i>                                | UDP-glucuronic acid epimerase                                                                              | CPS4 synthesis          | Xu <i>et al.</i> , 2003                 |
| 3B12                               | <i>BT1341</i>                                | UDP-glucose 6-dehydrogenase                                                                                | CPS4 synthesis          | Xu <i>et al.</i> , 2003                 |
| 1G11                               | <i>BT1353</i>                                | glycosyltransferase                                                                                        | CPS4 synthesis          | Xu <i>et al.</i> , 2003                 |
| 1F11                               | <i>BT1352</i>                                | glycosyltransferase                                                                                        | CPS4 synthesis          | Xu <i>et al.</i> , 2003                 |
| Transposon mutant in $\Delta$ CPS4 |                                              |                                                                                                            |                         |                                         |
| 1G8                                | <i>BT1358</i>                                | transcriptional regulator UpxY homolog                                                                     | capsule regulation      | Chatzidaki-Livanis <i>et al.</i> , 2010 |
| 23A12                              | <i>BT1358 // BT1357</i><br>intergenic region | transcriptional regulator UpxY homolog // UpxZ homolog                                                     | capsule regulation      | Chatzidaki-Livanis <i>et al.</i> , 2010 |
| 42B5                               | <i>BT1358</i>                                | transcriptional regulator UpxY homolog                                                                     | capsule regulation      | Chatzidaki-Livanis <i>et al.</i> , 2010 |
| 38G6                               | <i>BT1358</i>                                | transcriptional regulator UpxY homolog                                                                     | capsule regulation      | Chatzidaki-Livanis <i>et al.</i> , 2010 |
| 41C9                               | <i>BT1358</i>                                | transcriptional regulator UpxY homolog                                                                     | capsule regulation      | Chatzidaki-Livanis <i>et al.</i> , 2010 |
| 34H5                               | <i>BT2934</i>                                | wzx homolog, LPS biosynthesis transmembrane transport protein, Multidrug and toxin extrusion (MATE) domain | protein O-glycosylation | Fletcher <i>et al.</i> , 2009           |

2  
3  
4  
5  
6  
7  
8  
9  
10  
11  
12  
13

1. Xu J, *et al.* (2003) A genomic view of the human-Bacteroides thetaiotaomicron symbiosis.

2. Chatzidaki-Livanis M, Weinacht KG, & Comstock LE (2010) Trans locus inhibitors limit concomitant polysaccharide synthesis in the human gut symbiont Bacteroides fragilis. *Proceedings of the National Academy of Sciences of the United States of America* 107(26):11976-11980.

3. Fletcher CM, Coyne MJ, Villa OF, Chatzidaki-Livanis M, & Comstock LE (2009) A general O-glycosylation system important to the physiology of a major human intestinal symbiont. *Cell* 137(2):321-331.

4. Martens EC, Roth R, Heuser JE, & Gordon JI (2009) Coordinate regulation of glycan degradation and polysaccharide capsule biosynthesis by a prominent human gut symbiont. *The Journal of biological chemistry* 284(27):18445-18457.
