# Supplementary material for: Capsular Polysaccharide Cross-Regulation Modulates Bacteroides thetaiotaomicron Biofilm Formation
Source: PubMed Central journal article supplement (PMC7315117; doi:10.1128/mbio.00729-20), 2020-06-23
Supplement: mBio.00729-20-st002.pdf [file mBio.00729-20-st002.pdf]

1 Supplementary Table S2. List of strains and plasmids used in this study.

| Name in this paper                                                                                                                   | Genotype                                                                                | Reference                       |
|--------------------------------------------------------------------------------------------------------------------------------------|-----------------------------------------------------------------------------------------|---------------------------------|
| <i>Bacteroides thetaiotaomicron</i>                                                                                                  |                                                                                         |                                 |
| WT                                                                                                                                   | VPI 5482 <i>_Atdk</i>                                                                   | Koropatkin <i>et al.</i> , 2008 |
| 1C1                                                                                                                                  | VPI 5482 <i>_Atdk</i> - BT1356::Tn                                                      | This study                      |
| 2C7                                                                                                                                  | VPI 5482 <i>_Atdk</i> - BT1342::Tn                                                      | This study                      |
| 3B12                                                                                                                                 | VPI 5482 <i>_Atdk</i> - BT1341::Tn                                                      | This study                      |
| 1G11                                                                                                                                 | VPI 5482 <i>_Atdk</i> - BT1353::Tn                                                      | This study                      |
| 1F11                                                                                                                                 | VPI 5482 <i>_Atdk</i> - BT1352::Tn                                                      | This study                      |
| $\Delta$ CPS4                                                                                                                        | VPI 5482 <i>_Atdk</i> $\Delta$ BT1356-38                                                | This study                      |
| CPS1-only                                                                                                                            | VPI 5482 <i>_Atdk</i> $\Delta$ <i>cps2-8</i> <i>cps1</i> -lock                          | Porter <i>et al.</i> 2017       |
| CPS2-only                                                                                                                            | VPI 5482 <i>_Atdk</i> $\Delta$ <i>cps1</i> $\Delta$ <i>cps3-8</i>                       | Porter <i>et al.</i> 2017       |
| CPS3-only                                                                                                                            | VPI 5482 <i>_Atdk</i> $\Delta$ <i>cps1-2</i> $\Delta$ <i>cps4-8</i> <i>cps3</i> -lock   | Porter <i>et al.</i> 2017       |
| CPS4-only                                                                                                                            | VPI 5482 <i>_Atdk</i> $\Delta$ <i>cps1-3</i> $\Delta$ <i>cps5-8</i>                     | Porter <i>et al.</i> 2017       |
| CPS5-only                                                                                                                            | VPI 5482 <i>_Atdk</i> $\Delta$ <i>cps1-4</i> $\Delta$ <i>cps6-8</i> <i>cps5</i> -lock   | Porter <i>et al.</i> 2017       |
| CPS6-only                                                                                                                            | VPI 5482 <i>_Atdk</i> $\Delta$ <i>cps1-5</i> $\Delta$ <i>cps7-8</i> <i>cps6</i> -lock   | Porter <i>et al.</i> 2017       |
| CPS7-only                                                                                                                            | VPI 5482 <i>_Atdk</i> $\Delta$ <i>cps1-6</i> $\Delta$ <i>cps8</i>                       | Porter <i>et al.</i> 2017       |
| CPS8-only                                                                                                                            | VPI 5482 <i>_Atdk</i> $\Delta$ <i>cps1-7</i> <i>cps8</i> -lock                          | Porter <i>et al.</i> 2017       |
| $\Delta$ CPS1-8                                                                                                                      | VPI 5482 <i>_Atdk</i> $\Delta$ <i>cps1-8</i>                                            | Porter <i>et al.</i> 2017       |
| $\Delta$ CPS4 $\Delta$ CPS7                                                                                                          | VPI 5482 <i>_Atdk</i> $\Delta$ BT1356-38 $\Delta$ BT2886-62                             | This study                      |
| $\Delta$ CPS4 $\Delta$ CPS8                                                                                                          | VPI 5482 <i>_Atdk</i> $\Delta$ BT1356-38 $\Delta$ BT0038-68                             | This study                      |
| 1G8                                                                                                                                  | VPI 5482 <i>_Atdk</i> $\Delta$ BT1356-38-BT1358::Tn                                     | This study                      |
| 23A12                                                                                                                                | VPI 5482 <i>_Atdk</i> $\Delta$ BT1356-38-BT1358-7 intergenic region::Tn                 | This study                      |
| 42B5                                                                                                                                 | VPI 5482 <i>_Atdk</i> $\Delta$ BT1356-38-BT1358::Tn                                     | This study                      |
| 38G6                                                                                                                                 | VPI 5482 <i>_Atdk</i> $\Delta$ BT1356-38-BT1358::Tn                                     | This study                      |
| 41C9                                                                                                                                 | VPI 5482 <i>_Atdk</i> $\Delta$ BT1356-38-BT1358::Tn                                     | This study                      |
| 34H5                                                                                                                                 | VPI 5482 <i>_Atdk</i> $\Delta$ BT1356-38-BT2934::Tn                                     | This study                      |
| $\Delta$ <i>upxZ</i> <sup>BT1357</sup> $\Delta$ CPS4                                                                                 | VPI 5482 <i>_Atdk</i> $\Delta$ BT1356-38 $\Delta$ BT1357                                | This study                      |
| <i>upxY</i> <sup>BT1358</sup> $\Delta$ CPS4                                                                                          | VPI 5482 <i>_Atdk</i> $\Delta$ BT1356-38 $\Delta$ BT1358                                | This study                      |
| $\Delta$ <i>upxY</i> <sup>BT1358</sup> -<br>$\Delta$ <i>upxZ</i> <sup>BT1357</sup> $\Delta$ CPS4                                     | VPI 5482 <i>_Atdk</i> $\Delta$ BT1356-38 $\Delta$ BT1358-7                              | This study                      |
| $\Delta$ <i>upxZ</i> <sup>BT1357</sup> $\Delta$ CPS4 $\Delta$ CPS2                                                                   | VPI 5482 <i>_Atdk</i> $\Delta$ BT1356-38 $\Delta$ BT1357 $\Delta$ BT0463-82             | This study                      |
| $\Delta$ <i>upxY</i> <sup>BT1358</sup> -<br>$\Delta$ <i>upxZ</i> <sup>BT1357</sup> $\Delta$ CPS4 +<br>vector                         | VPI 5482 <i>_Atdk</i> $\Delta$ BT1356-38 $\Delta$ BT1358-7 + pNBU2-bla-erm-p1311        | This study                      |
| $\Delta$ <i>upxY</i> <sup>BT1358</sup> -<br>$\Delta$ <i>upxZ</i> <sup>BT1357</sup> $\Delta$ CPS4 +<br><i>pupxZ</i> <sup>BT1357</sup> | VPI 5482 <i>_Atdk</i> $\Delta$ BT1356-38 $\Delta$ BT1358-7 + pNBU2-bla-erm-p1311-BT1357 | This study                      |

|                                                      |                                                                                         |            |
|------------------------------------------------------|-----------------------------------------------------------------------------------------|------------|
| $\Delta upxZ^{BT1357}\Delta CPS4$ + vector           | VPI 5482 $\Delta tdk \Delta BT1356-38 \Delta BT1357$ + pNBU2-bla-erm-p1311              | This study |
| $\Delta upxZ^{BT1357}\Delta CPS4$ + $pupxZ^{BT1357}$ | VPI 5482 $\Delta tdk \Delta BT1356-38 \Delta BT1357$ + pNBU2-bla-erm-p1311-BT1357       | This study |
| $\Delta CPS4\Delta BT2934-2938$                      | VPI 5482 $\Delta tdk \Delta BT1356-38 \Delta BT2934-8$                                  | This study |
| $\Delta CPS4\Delta BT2935-2938$                      | VPI 5482 $\Delta tdk \Delta BT1356-38 \Delta BT2935-8$                                  | This study |
| $\Delta CPS4\Delta BT2934-2938$ + Vector             | VPI 5482 $\Delta tdk \Delta BT1356-38 \Delta BT2934-8+$ pNBU2-bla-tet-p1311             | This study |
| $\Delta CPS4\Delta BT2934-2938$ + pBT2934            | VPI 5482 $\Delta tdk \Delta BT1356-38 \Delta BT2934-8+$ pNBU2-bla-tet-p1311-BT2934      | This study |
| 34H5 + Vector                                        | VPI 5482 $\Delta tdk \Delta BT1356-38 \Delta BT2934::Tn+$ pNBU2-bla-tet-p1311           | This study |
| 34H5 + pBT2934                                       | VPI 5482 $\Delta tdk \Delta BT1356-38 \Delta BT2934::Tn+$ pNBU2-bla-tet-p1311-BT2934    | This study |
| WT-ery                                               | VPI 5482 $\Delta tdk+$ pNBU2-bla-ery-p1311                                              | This study |
| WT-tet                                               | VPI 5482 $\Delta tdk+$ pNBU2-bla-tet-p1311                                              | This study |
| $\Delta CPS4-ery$                                    | VPI 5482 $\Delta tdk \Delta BT1356-38+$ pNBU2-bla-ery-p1311                             | This study |
| $\Delta CPS4-tet$                                    | VPI 5482 $\Delta tdk \Delta BT1356-38+$ pNBU2-bla-tet-p1311                             | This study |
| $\Delta BT2934-2938$                                 | VPI 5482 $\Delta tdk \Delta BT2934-8$                                                   | This study |
| $\Delta BT2934-2938$ tet                             | VPI 5482 $\Delta tdk \Delta BT2934-8$ + pNBU2-bla-tet-p1311                             | This study |
| $\Delta CPS4\Delta BT2934-2938$ tet                  | VPI 5482 $\Delta tdk \Delta BT1356-38 \Delta BT2934-8+$ pNBU2-bla-tet-p1311             | This study |
| CPS1-only+pBT2934                                    | VPI 5482 $\Delta tdk \Delta cps2-8 cps1-lock+$ pNBU2-bla-tet-p1311-BT2934               | This study |
| CPS2-only+pBT2934                                    | VPI 5482 $\Delta tdk \Delta cps1 \Delta cps3-8+$ pNBU2-bla-tet-p1311-BT2934             | This study |
| CPS3-only+pBT2934                                    | VPI 5482 $\Delta tdk \Delta cps1-2 \Delta cps4-8 cps3-lock+$ pNBU2-bla-tet-p1311-BT2934 | This study |
| CPS4-only+pBT2934                                    | VPI 5482 $\Delta tdk \Delta cps1-3 \Delta cps5-8+$ pNBU2-bla-tet-p1311-BT2934           | This study |
| CPS5-only+pBT2934                                    | VPI 5482 $\Delta tdk \Delta cps1-4 \Delta cps6-8 cps5-lock+$ pNBU2-bla-tet-p1311-BT2934 | This study |
| CPS6-only+pBT2934                                    | VPI 5482 $\Delta tdk \Delta cps1-5 \Delta cps7-8 cps6-lock+$ pNBU2-bla-tet-p1311-BT2934 | This study |
| CPS8-only+pBT2934                                    | VPI 5482 $\Delta tdk \Delta cps1-7 cps8-lock+$ pNBU2-bla-tet-p1311-BT2934               | This study |
| <b>Escherichia coli</b>                              |                                                                                         |            |
| S17 $\lambda$ pir_pSAM-bt                            | S17 $\lambda$ pir_pSAM-bt                                                               | This study |
| S17 $\lambda$ pir_pExchange-tdk                      | S17 $\lambda$ pir_pExchange-tdk                                                         | This study |
| S17 $\lambda$ pir_pExchange-BT1356-38                | S17 $\lambda$ pir_pExchange-BT1356-38                                                   | This study |
| S17 $\lambda$ pir_pExchange-BT2886-62                | S17 $\lambda$ pir_pExchange-BT2886-62                                                   | This study |
| S17 $\lambda$ pir_pExchange-BT0038-68                | S17 $\lambda$ pir_pExchange-BT0038-68                                                   | This study |
| S17 $\lambda$ pir_pExchange-BT1357                   | S17 $\lambda$ pir_pExchange-BT1357                                                      | This study |
| S17 $\lambda$ pir_pExchange-BT1358                   | S17 $\lambda$ pir_pExchange-BT1358                                                      | This study |
| S17 $\lambda$ pir_pExchange-BT1358-7                 | S17 $\lambda$ pir_pExchange-BT1358-7                                                    | This study |
| S17 $\lambda$ pir_pExchange-BT0463-82                | S17 $\lambda$ pir_pExchange-BT0463-82                                                   | This study |

|                                    |                                                   |                              |
|------------------------------------|---------------------------------------------------|------------------------------|
| S17λpir_pExchange-BT2934-8         | S17λpir_pExchange-BT2934-8                        | This study                   |
| S17λpir_pExchange-BT2935-8         | S17λpir_pExchange-BT2935-8                        | This study                   |
| S17λpir_pNBU2-bla-erm-p1311        | S17λpir_pNBU2-bla-erm-p1311                       | This study                   |
| S17λpir_pNBU2-bla-erm-p1311-BT1357 | S17λpir_pNBU2-bla-erm-p1311-BT1357                | This study                   |
| S17λpir_pNBU2-bla-tet-p1311        | S17λpir_pNBU2-bla-tet-p1311                       | This study                   |
| S17λpir_pNBU2-bla-tet-p1311-BT2934 | S17λpir_pNBU2-bla-tet-p1311-BT2934                | This study                   |
|                                    |                                                   |                              |
|                                    |                                                   |                              |
| <b>Name</b>                        | <b>Description</b>                                | <b>Reference</b>             |
| <b>Plasmids</b>                    |                                                   |                              |
| pSAM-bt                            | Random transposon mutagenesis                     | Goodman <i>et al.</i> , 2009 |
| pExchange-tdk                      | Site-directed unmarked gene deletion              | Martens <i>et al.</i> , 2008 |
| pExchange-BT1356-38                | Site-directed unmarked gene deletion of BT1356-38 | This study                   |
| pExchange-BT2886-62                | Site-directed unmarked gene deletion of BT2882-62 | This study                   |
| pExchange-BT0038-68                | Site-directed unmarked gene deletion of BT0038-68 | This study                   |
| pExchange-BT1357                   | Site-directed unmarked gene deletion of BT1357    | This study                   |
| pExchange-BT1358                   | Site-directed unmarked gene deletion of BT1358    | This study                   |
| pExchange-BT1358-7                 | Site-directed unmarked gene deletion of BT1358-7  | This study                   |
| pExchange-BT0463-82                | Site-directed unmarked gene deletion of BT0463-82 | This study                   |
| pExchange-BT2934-8                 | Site-directed unmarked gene deletion of BT2934-8  | This study                   |
| pExchange-BT2935-8                 | Site-directed unmarked gene deletion of BT2935-8  | This study                   |
| pNBU2-bla-erm                      | Complementation                                   | Wang et al 2000              |
| Vector (erm)                       | Complementation                                   | This study                   |
| pupxZ <sup>BT1357</sup>            | Complementation with BT1357                       | This study                   |
| Vector (tet)                       | Complementation                                   | This study                   |
| pBT2934                            | Complementation with BT2934                       | This study                   |

- 2 1. Koropatkin NM, Martens EC, Gordon JI, & Smith TJ (2008) Starch catabolism by a prominent human
- 3 gut symbiont is directed by the recognition of amylose helices. *Structure* 16(7):1105-1115.
- 4 2. Porter NT & Martens EC (2017) The Critical Roles of Polysaccharides in Gut Microbial Ecology and
- 5 Physiology. *Annual review of microbiology* 71:349-369.
- 6 3. Goodman AL, *et al.* (2009) Identifying genetic determinants needed to establish a human gut symbiont
- 7 in its habitat. *Cell host & microbe* 6(3):279-289.
- 8 4. Martens EC, Roth R, Heuser JE, & Gordon JI (2009) Coordinate regulation of glycan degradation and
- 9 polysaccharide capsule biosynthesis by a prominent human gut symbiont. *The Journal of biological*
- 10 *chemistry* 284(27):18445-18457.
- 11 5. Wang J, Shoemaker NB, Wang G-R, & Salyers AA (2000) Characterization of a Bacteroides
- 12 Mobilizable Transposon, NBU2, Which Carries a Functional Lincomycin Resistance Gene. *Journal of*
- 13 *bacteriology* 182(12):3559-3571.
- 14
- 15
