# Supplementary material for: Capsular Polysaccharide Cross-Regulation Modulates Bacteroides thetaiotaomicron Biofilm Formation
Source: PubMed Central journal article supplement (PMC7315117; doi:10.1128/mbio.00729-20), 2020-06-23
Supplement: mBio.00729-20-st003.pdf [file mBio.00729-20-st003.pdf]

1 Supplementary Table S3. **Primers used in this study**

2

| Construct             | Name       | Sequence (5'-->3')                                               |
|-----------------------|------------|------------------------------------------------------------------|
| pExchange             | pEx-ch-F   | TGGGAATTCCTCCACCGC                                               |
|                       | pEx-ch-R   | GGGGAGAGGACGGACAGAAGAT                                           |
|                       | pExchangeR | CGTCGACTCGAATGTTATCTTC                                           |
|                       | pExchangeF | TCTAGAGCGGCCGCCACC                                               |
| pExchange-BT1356-1338 | 1356-5R    | AGAACAATAAAGTAGAATGCTAAAAAGTCGTTGTATTTTC                         |
|                       | 1356-5F    | GCGGTCGACAGAATAACGAATAAGTGTGGGG                                  |
|                       | 1356-3F    | GAAAATACAACGACTTTTTAGCATTCTACTTTTTGTTC<br>TTTCTTAGAATTGAAATAAACG |
|                       | 1356-3R    | CCCTCTAGAATTCGATCCTACGAATACGACC                                  |
| pExchange-BT0038-0068 | cps8-intF  | ACGGCATAGATGTAGCCAAAAG                                           |
|                       | cps8-intR  | GATCGCCCAACCTAGTGTC                                              |
|                       | cps8-3F    | TTGATAATTCTTTTAAACATGATGCATGGTCTATTACAA<br>CCTGTC                |
|                       | cps8-3R    | GCGGTGGCGGCCGCTCTAGACAAAGAAGCTTTCCTTCT<br>GAC                    |
|                       | cps8-5R    | GGTTGTAATAGACCATGCATCATGTTTAAAAGAATTATC<br>AATAGAAACATG          |
|                       | cps8-5F    | AGATAACATTCGAGTCGACGCATAAATTAGTTTGAGCG<br>ACG                    |
| pExchange-BT2886-2862 | cps7-extF  | GACTGTTCCGAACATTG                                                |
|                       | cps7-extR  | AGCCTTGCTCAAAACTGG                                               |
|                       | cps7-5R    | GTCAGAGAGAAATGATAGCAAATAACTCCTCCAATTCT<br>ATCATTTAAAG            |
|                       | cps7-5F    | AGATAACATTCGAGTCGACGGCAGAGTGAACTTTATCC<br>TC                     |
|                       | cps7-3F    | ATAGAATTGGAGGAGTTATTTGCTATCATTCTCTCTGA<br>CAGATG                 |
|                       | cps7-3R    | GCGGTGGCGGCCGCTCTAGATCCTTAGTCCCTGTACCC                           |
| pExchange-BT1358      | 1358-5F    | GCGGTGGCGGCCGCTCTAGACAGCAGCCTCATTCTTTA<br>GTGC                   |
|                       | 1358-5R    | TTTCACTTATATTTAAACCCTATTTACCCACACTTATT<br>CGT                    |
|                       | 1358-3F    | AATAAGTGTGGGGTAAATAGGGGTTTAAATATAAGTGA<br>AACAAGCA               |

|                           |            |                                                        |
|---------------------------|------------|--------------------------------------------------------|
|                           | 1358-3R    | AGATAACATTCGAGTCGACGGTTGCATGCACTCATCCG                 |
| pExchange-BT1357          | 1357-3R    | AGATAACATTCGAGTCGACGTGATTGTAATCTTGATATG<br>CTAGCAAAG   |
|                           | 1357-3F    | ATTAAGTGAATAAAAGGGGTCTTTTTTATTGTCAATGA<br>AAATACAACGAC |
|                           | 1357-5R    | TTCATTGACAAATAAAAAAGACCCCTTTTATTCACTTAA<br>TGCTTG      |
|                           | 1357-5F    | GCGGTGGCGGCCGCTCTAGATGTCAAGTTCAGGTTTCA<br>GGTC         |
| pExchange-BT1358-<br>1357 | 1357-58 3F | AATAAGTGTGGGGTAAATAGCTTTTTTATTGTCAATGA<br>AAATACAACGAC |
|                           | 1357-58 5R | TTCATTGACAAATAAAAAAGCTATTTACCCACACTTAT<br>TCGT         |
| pExchange-BT0463-<br>0482 | cps2-3R    | GCGGTGGCGGCCGCTCTAGAGATTGAAAGTGGCGGCAG                 |
|                           | cps2-3F    | TGAGTACTAATAACAAATCATCCGGTCTAAGAATAAA<br>CCTGAG        |
|                           | cps2-5R    | GGTTTATTCTTAGAACCGGATGATTTGTTATTAGTACTC<br>AAGATTTGAG  |
|                           | cps2-5F    | AGATAACATTCGAGTCGACGTGAAAGCTGTCAGGAAGC<br>TAAG         |
| pExchange-BT2934-<br>2938 | 2934-5F    | AGATAACATTCGAGTCGACGGGAAAGACTTCCAGGCAC<br>G            |
|                           | 2934-5R    | GCATTTGGGGACTTCACCGGATTATTATAATCGGTGAA<br>GGAGAGTG     |
|                           | 2938-3F    | CCTTCACCGATTATAATAATCCGGTGAAGTCCCCAAATG<br>C           |
|                           | 2938-3R    | GCGGTGGCGGCCGCTCTAGATCTCTATGAATGTCTGT<br>TTCGT         |
| pExchange-BT2935-<br>2938 | 2935-5F    | AGATAACATTCGAGTCGACGGGATAGCTCCGCGAGCTC                 |
|                           | 2935-5R    | GCATTTGGGGACTTCACCGGTCATGATATCTTTTTCTTT<br>TAATGAACTG  |
|                           | 35-2938-3F | AAAAGAAAAAGATATCATGACCGGTGAAGTCCCCAAAT<br>GC           |
| pNBU2-bla                 | pNBU-chR   | GCCAATGCACAAATGCTGTCC                                  |
|                           | pNBU-chF   | CAGGTGTATTCCCATCCGG                                    |
|                           | pNBU-F     | CGACGTCGACTAATTGCC                                     |
|                           | pNBU-R     | ATGTTAAAAACAGATTTGGAGTGC                               |

|                            |               |                                                          |
|----------------------------|---------------|----------------------------------------------------------|
| pNBU2-bla-tetR             | pNBU-del-eryF | ATGTCATCAAATAAAAACAATAGGCCACATGCAAC                      |
|                            | pNBU-del-eryR | ATTTATAATATTCATTATAACCTCTCCTTAATTTATTG                   |
|                            | tetQ-F        | ATTAAGGAGAGGTTATAATGAATATTATAAAATTTAGGA<br>ATTCTTGCTC    |
|                            | tetQ-R        | TTGCATGTGGCCTATTGTTTTTATTTTGATGACATTGATT<br>TTTGG        |
|                            | tetQ-NBU-chF  | CGGGATGAACCATGAGTAC                                      |
|                            | tetQ-NBU-chR  | GTACCGAGGACGCGTAAAC                                      |
| pNBU2-bla-erm-BT1357       | pNBU-1357F    | TCCAAATCTGTTTTTAACATATGGTGAGTTTTTTACTAC<br>AAG           |
|                            | pNBU-1357R    | TAGGCAATTAGTCGACGTCGTTAGTTGGTTTCACACAGT<br>TCC           |
| pNBU2-bla-tet-p1311-BT2934 | NBU-2934-F    | CACTCCAAATCTGTTTTTAACATATGAGTGAAGAACAGT<br>CACTGAAAC     |
|                            | NBU-2934-R    | GATAGGCAATTAGTCGACGTCGTCATGATATCTTTTTCT<br>TTTTAATGAACTG |
| qPCR                       | 16SQF         | TCAGCTCGTGTGTGAAATG                                      |
|                            | 16SQR         | GTAAGGGCCATGATGACTTG                                     |
|                            | rpoB-Q-F      | CAAATTCACGCCCAAAGTT                                      |
|                            | rpoB-Q-R      | GTGCGTCAGGAAGATATG                                       |
|                            | 0381-QF       | CGCTTTATCATGTCGTTGGA                                     |
|                            | 0381-QR       | GTACAAGCCGGAGCTTTTTG                                     |
|                            | 0463-QF       | TCCGATCACAAAAGGAGTGA                                     |
|                            | 0463-QR       | ACGTTTTAAAGCCCGGAAGAT                                    |
|                            | 0602-QF       | TTGGGTTACATCGGTCTTCC                                     |
|                            | 0602-QR       | TTTGAAGGTGGTGTGACCTG                                     |
|                            | 1355-QR       | CGCAGGTTCTATCACTGCAA                                     |
|                            | 1355-QF       | AGGAGCGATTGCAAATGAC                                      |
|                            | 1653-QF       | TGTTCCATTGAAAGCTTCAGG                                    |
|                            | 1653-QR       | CTCCCCATCAATATCCAGCTT                                    |
|                            | 1722-QR       | TGCAAAGACTGGCTTTTCCT                                     |
|                            | 1722-QF       | TGAGCAGGAGCGTTTACAGA                                     |
|                            | 2885-QR       | TAGAGGAAGAGTCCCCTTGGT                                    |
|                            | 2885-QF       | GGCAACGCAAATGGATTACTA                                    |
|                            | 0039-QF       | GGCATTGCTTGTTTTATGGA                                     |
|                            | 0039-QR       | AGGGCTGGTCATATCGTTTTCT                                   |
